# Supplementary material
Source: ML conference proceedings conference paper supplement (https://openaccess.thecvf.com/content/ICCV2023/html/Roth_Waffling_Around_for_ICCV_2023_paper.html)
Supplement: Supplementary file 1 [file Roth_Waffling_Around_for_ICCV_2023_supplemental.pdf]

## SUPPLEMENTARY MATERIAL: Waffling around for Performance: Visual Classification with Random Words and Broad Concepts

In this supplementary material, we first provide a collection of additional results in §A which extend those presented in the main paper to more backbone models. Finally, we showcase the GPT-generated descriptors for our additionally used benchmarks beyond [36] (§B), and present some exemplary images from the eleven benchmarks used in this work in Fig. 7.

### A. Additional results

**Motivational experiments for random class descriptors.** In Tab. 9, we extend our motivational experiments on random class descriptor assignment to motivate WaffleCLIP from Tab. 1, highlighting similar behaviour on both a larger ViT-L/14 and a ResNet50 backbone network. Descriptor randomization does not result in a significant drop in performance, but rather yields performances that match DCLIP.

**Comparison of WaffleCLIP and DCLIP.** Tab. 10 extends results from Tab. 2 on the ViT-L/14 and ResNet50 backbones, in which WaffleCLIP as a standalone method, as well as equipped with high-level concepts and/or joint usage of LLM-generated descriptors, is compared to DCLIP. The results confirm our conclusions drawn in §4.2, wherein WaffleCLIP, without access to any external LLM, can match the performance of LLM-descriptor-based approaches like DCLIP. In addition to that, we again find complementarity of randomized descriptors and LLM-generated descriptors. Furthermore, we observe performance gains through the usage of automatically generated high-level concepts.

**Progression from systematic to fully randomized descriptor scrambling.** Tab. 11 extends the descriptor scrambling progression studies from Tab. 4 to two additional backbones, namely, ViT-L/14 and ResNet50. Similar to the ViT-B/32 backbone, a move from systematic semantic shifts to independently subsampled descriptors can recover and even beat the performance of DCLIP.

### B. Exemplary GPT-3 generated descriptors for additional benchmarks

As we introduce descriptions for three additional datasets beyond those used in [36], we provide four example descriptors for three random classes in each dataset.

#### Flowers102

##### Pink Primrose

- "delicate flower"
- "five petals in a star shape"
- "pink in color"
- "often has yellow center"

##### Balloon Flower

- "a delicate flower with five petals"
- "a unique balloon-like shape"
- "a star-shaped center in the middle of the flower"
- "vibrant colors such as pink, purple, blue, white, and yellow"

##### Sunflower

- "large, bright yellow petals"
- "a dark center surrounded by disk florets"
- "long stem"
- "a single, long, narrow leaves tapered to a point"

#### FGVCAircraft

##### A300

- "black or silver color"
- "a rectangular body with rounded edges"
- "two lens ports"
- "a mode dial"

##### EMB-120

- "a cabin with 30-33 seats"
- "a distinctive high-wing design"
- "two Pratt and Whitney PW118 turboprop engines"
- "a T-tail configuration"

##### Tornado

- "dark, rotating funnel-shaped cloud"
- "strong winds"
- "dark clouds"
- "heavy precipitation"

| <b>ViT-L/14</b>  | ImageNetV2       | ImageNet                | CUB200                  | EuroSAT                 | Places365        | Food101                 | Oxford Pets             | DTD              | <b>Avg</b>              |
|------------------|------------------|-------------------------|-------------------------|-------------------------|------------------|-------------------------|-------------------------|------------------|-------------------------|
| CLIP [47]        | 67.90            | 73.37                   | 62.24                   | 56.03                   | 40.46            | 92.55                   | 93.30                   | 52.87            | 67.34                   |
| DCLIP [36]       | <b>69.72</b>     | 75.26                   | 63.53                   | 58.72                   | <b>42.60</b>     | 92.81                   | 93.89                   | <b>56.60</b>     | 69.14                   |
| DCLIP (same, 1x) | 69.27 $\pm$ 0.23 | 75.05 $\pm$ 0.15        | 64.21 $\pm$ 0.36        | 57.59 $\pm$ 1.72        | 42.01 $\pm$ 0.23 | 93.15 $\pm$ 0.13        | 93.97 $\pm$ 0.22        | 55.16 $\pm$ 0.47 | 68.80 $\pm$ 0.66        |
| DCLIP (same, 2x) | 69.58 $\pm$ 0.21 | <b>75.30</b> $\pm$ 0.16 | <b>64.30</b> $\pm$ 0.26 | <b>59.32</b> $\pm$ 1.63 | 42.28 $\pm$ 0.17 | <b>93.31</b> $\pm$ 0.05 | <b>94.04</b> $\pm$ 0.11 | 55.31 $\pm$ 0.50 | <b>69.18</b> $\pm$ 0.62 |

  

| <b>ResNet50</b>  | ImageNetV2              | ImageNet                | CUB200                  | EuroSAT                 | Places365               | Food101                 | Oxford Pets      | DTD              | <b>Avg</b>              |
|------------------|-------------------------|-------------------------|-------------------------|-------------------------|-------------------------|-------------------------|------------------|------------------|-------------------------|
| CLIP [47]        | 51.34                   | 58.16                   | 45.20                   | 28.09                   | 36.63                   | 78.37                   | 83.76            | 38.51            | 52.51                   |
| DCLIP [36]       | 52.70                   | 59.66                   | <b>47.76</b>            | 34.27                   | 38.39                   | 78.59                   | <b>85.77</b>     | <b>41.01</b>     | 54.77                   |
| DCLIP (same, 1x) | 52.63 $\pm$ 0.28        | 59.69 $\pm$ 0.30        | <b>47.76</b> $\pm$ 0.39 | 32.74 $\pm$ 1.49        | 38.63 $\pm$ 0.22        | 80.08 $\pm$ 0.58        | 85.36 $\pm$ 0.52 | 40.77 $\pm$ 0.63 | 54.71 $\pm$ 0.67        |
| DCLIP (same, 1x) | <b>52.89</b> $\pm$ 0.23 | <b>59.90</b> $\pm$ 0.26 | 47.70 $\pm$ 0.29        | <b>34.37</b> $\pm$ 1.27 | <b>38.93</b> $\pm$ 0.21 | <b>80.11</b> $\pm$ 0.30 | 85.34 $\pm$ 0.29 | 40.91 $\pm$ 0.79 | <b>55.02</b> $\pm$ 0.58 |

Table 9: **Motivating random class descriptors - additional backbones.** Extension of our motivational experiments from Tab. 1 with ViT-L/14 and ResNet50 backbones.

| <b>ViT-L/14</b>         | ImageNetV2              | ImageNet                | CUB200                  | EuroSAT                 | Places365               | Food101                 | Oxford Pets             | DTD                     | <b>Avg</b>              |
|-------------------------|-------------------------|-------------------------|-------------------------|-------------------------|-------------------------|-------------------------|-------------------------|-------------------------|-------------------------|
| CLIP [47]               | 67.90                   | 73.37                   | 62.24                   | 56.03                   | 40.46                   | 92.55                   | 93.30                   | 52.87                   | 67.34                   |
| + Concepts              | ↓                       | ↓                       | 63.01                   | 61.23                   | 41.07                   | 93.52                   | 93.65                   | ↓                       | 68.32                   |
| DCLIP [36]              | <b>69.72</b>            | 75.26                   | 63.53                   | 58.72                   | 42.60                   | 92.81                   | 93.89                   | <b>56.60</b>            | 69.14                   |
| WaffleCLIP (ours)       | 69.48 $\pm$ 0.08        | 75.30 $\pm$ 0.04        | <b>64.18</b> $\pm$ 0.13 | <b>61.17</b> $\pm$ 0.35 | 42.26 $\pm$ 0.10        | 93.31 $\pm$ 0.09        | 91.98 $\pm$ 0.11        | 53.94 $\pm$ 0.29        | 68.95 $\pm$ 0.18        |
| + Concepts              | ↓                       | ↓                       | 63.40 $\pm$ 0.17        | 60.20 $\pm$ 0.87        | 42.57 $\pm$ 0.09        | <b>93.65</b> $\pm$ 0.05 | <b>94.38</b> $\pm$ 0.08 | ↓                       | 69.12 $\pm$ 0.33        |
| + GPT descr.            | <b>69.80</b> $\pm$ 0.13 | <b>75.57</b> $\pm$ 0.06 | <b>64.32</b> $\pm$ 0.21 | <b>60.63</b> $\pm$ 1.23 | <b>42.96</b> $\pm$ 0.12 | 93.28 $\pm$ 0.08        | 93.35 $\pm$ 0.22        | <b>56.33</b> $\pm$ 0.42 | <b>69.53</b> $\pm$ 0.48 |
| + GPT descr. + Concepts | ↓                       | ↓                       | 63.14 $\pm$ 0.16        | <b>61.82</b> $\pm$ 1.07 | <b>42.95</b> $\pm$ 0.09 | 93.49 $\pm$ 0.04        | 94.12 $\pm$ 0.09        | ↓                       | <b>69.65</b> $\pm$ 0.42 |

  

| <b>ResNet50</b>         | ImageNetV2              | ImageNet                | CUB200                  | EuroSAT                 | Places365               | Food101                 | Oxford Pets             | DTD              | <b>Avg</b>              |
|-------------------------|-------------------------|-------------------------|-------------------------|-------------------------|-------------------------|-------------------------|-------------------------|------------------|-------------------------|
| CLIP [47]               | 51.34                   | 58.16                   | 45.20                   | 28.09                   | 36.63                   | 78.37                   | 83.76                   | 38.51            | 52.51                   |
| + Concepts              | ↓                       | ↓                       | 46.60                   | 34.06                   | 37.43                   | 80.89                   | 83.43                   | ↓                | 53.80                   |
| DCLIP [36]              | <b>52.70</b>            | 59.66                   | 47.76                   | 34.27                   | 38.39                   | 78.59                   | <b>85.77</b>            | <b>41.01</b>     | 54.77                   |
| WaffleCLIP (ours)       | <b>52.89</b> $\pm$ 0.15 | <b>60.12</b> $\pm$ 0.12 | 47.68 $\pm$ 0.15        | 31.34 $\pm$ 0.47        | 38.32 $\pm$ 0.10        | 79.68 $\pm$ 0.17        | 84.32 $\pm$ 0.20        | 39.25 $\pm$ 0.27 | 54.20 $\pm$ 0.23        |
| + Concepts              | ↓                       | ↓                       | <b>48.34</b> $\pm$ 0.13 | 35.08 $\pm$ 0.42        | 39.03 $\pm$ 0.08        | <b>81.38</b> $\pm$ 0.08 | <b>85.80</b> $\pm$ 0.12 | ↓                | 55.24 $\pm$ 0.21        |
| + GPT descr. + Concepts | ↓                       | ↓                       | <b>48.41</b> $\pm$ 0.21 | <b>37.36</b> $\pm$ 0.62 | <b>39.43</b> $\pm$ 0.07 | 81.17 $\pm$ 0.09        | <b>85.82</b> $\pm$ 0.16 | ↓                | <b>55.75</b> $\pm$ 0.26 |

Table 10: **Performance of WaffleCLIP with additional backbones.** Here, we extend the comparison of WaffleCLIP (Tab. 2) to GPT-generated fine-grained class descriptors in DCLIP [36] for ViT-L/14 and ResNet50 backbones. We find similarly consistent insights, where our LLM-free WaffleCLIP can match the performance of DCLIP. Joint usage of both randomized and LLM-generated descriptors again reveals complementarity (WaffleCLIP + GPT descr). In addition to that, the usage of automatically extracted high-level semantic concepts can provide consistent additional performance gains (+ Concepts). We use (↓) to denote the same results as previous lines where high-level concept guidance is not applicable.

### Stanford Cars

#### Acura TL Sedan 2012

- "silver, grey, or black exterior"
- "Acura logo on the front grille"
- "distinctive headlights"
- "chrome accents on the exterior"

- "a curved hood"
- "wide, round headlights"
- "a Honda logo"

#### BMW X6 SUV 2012

- "four-door SUV"
- "sloping roof-line"
- "signature BMW kidney grille"
- "round headlights and taillights"

#### Honda Odyssey Minivan 2012

- "four doors and a hatchback"

| <b>ViT-L/14</b>      | ImageNetV2   | ImageNet     | CUB200       | EuroSAT      | Places365    | Food101     | Oxford Pets  | DTD          | <b>Avg</b>   |
|----------------------|--------------|--------------|--------------|--------------|--------------|-------------|--------------|--------------|--------------|
| DCLIP [36]           | <b>69.72</b> | <b>75.26</b> | 63.53        | <b>58.72</b> | <b>42.60</b> | 92.81       | 93.89        | <b>56.60</b> | <b>69.14</b> |
| DCLIP (interchanged) | 66.44 ±0.12  | 72.07 ±0.15  | 63.62 ±0.44  | 51.49 ±4.89  | 37.06 ±0.41  | 91.30 ±0.30 | 93.74 ±0.28  | 49.84 ±0.78  | 65.69 ±1.77  |
| DCLIP (scrambled)    | 68.68 ±0.21  | 74.47 ±0.11  | 63.78 ±0.13  | 55.98 ±2.01  | 41.29 ±0.23  | 92.29 ±0.20 | 93.52 ±0.18  | 53.28 ±1.12  | 67.91 ±0.83  |
| DCLIP (random, 1x)   | 68.01 ±0.22  | 73.89 ±0.08  | 63.81 ±0.22  | 55.72 ±2.01  | 40.32 ±0.29  | 92.37 ±0.31 | 93.60 ±0.19  | 52.83 ±0.46  | 67.57 ±0.76  |
| DCLIP (random, 5x)   | 69.27 ±0.17  | 75.11 ±0.08  | 64.25 ±0.16  | 58.34 ±1.55  | 42.11 ±0.14  | 93.22 ±0.12 | 93.88 ±0.09  | 55.28 ±0.23  | 68.93 ±0.57  |
| <b>ResNet50</b>      | ImageNetV2   | ImageNet     | CUB200       | EuroSAT      | Places365    | Food101     | Oxford Pets  | DTD          | <b>Avg</b>   |
| DCLIP [36]           | 52.70        | 59.66        | <b>47.76</b> | 34.27        | 38.39        | 78.59       | <b>85.77</b> | <b>41.01</b> | 54.77        |
| DCLIP (interchanged) | 49.80 ±0.22  | 56.35 ±0.06  | 47.68 ±0.32  | 28.17 ±4.43  | 33.77 ±0.34  | 77.59 ±0.29 | 84.60 ±0.63  | 35.81 ±1.12  | 51.72 ±1.64  |
| DCLIP (scrambled)    | 52.20 ±0.20  | 59.21 ±0.06  | 47.60 ±0.39  | 34.98 ±2.00  | 37.90 ±0.18  | 78.33 ±0.14 | 85.07 ±0.34  | 39.19 ±0.95  | 54.31 ±0.81  |
| DCLIP (random, 1x)   | 51.60 ±0.29  | 58.29 ±0.15  | 47.37 ±0.23  | 30.18 ±4.18  | 36.82 ±0.26  | 78.87 ±0.24 | 84.52 ±0.17  | 38.89 ±0.85  | 53.32 ±1.52  |
| DCLIP (random, 5x)   | 52.81 ±0.09  | 59.73 ±0.05  | 47.74 ±0.10  | 34.53 ±0.74  | 38.62 ±0.15  | 80.20 ±0.13 | 85.30 ±0.15  | 40.29 ±0.46  | 54.90 ±0.32  |

Table 11: **Progression from systematic to fully randomized descriptor scrambling - additional backbones.** We extend our descriptor scrambling progression studies from Tab. 4 to two additional backbones: ViT-L/14 and ResNet50. In both cases, the same trend can be seen, in which a move from systematic semantic shift to independently subsampled descriptors can recover the performance of DCLIP after an initial performance drop.

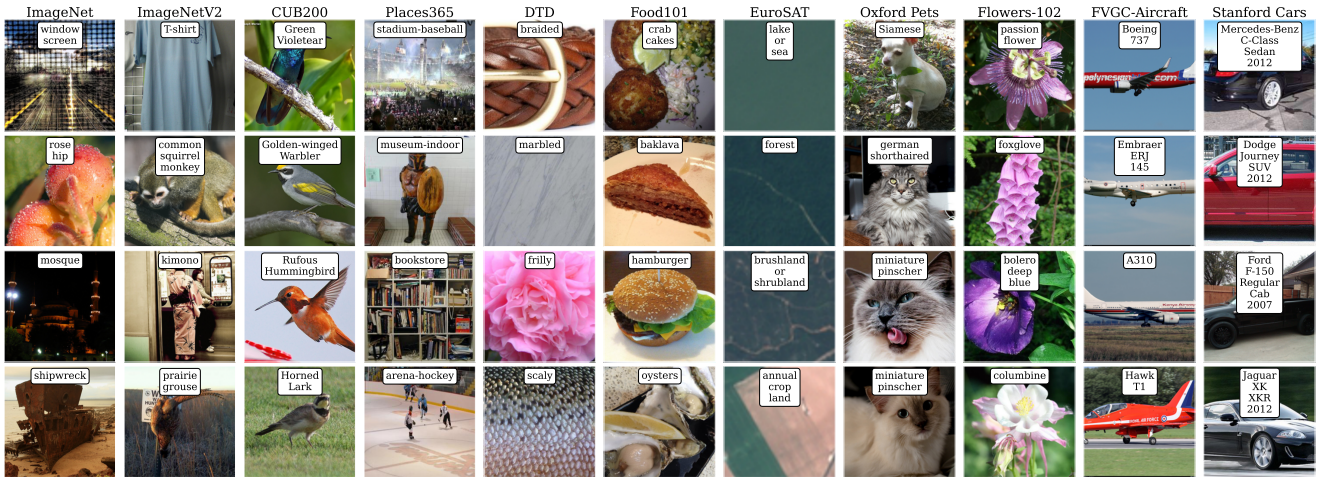

Figure 7: To get an intuition of the different visual classification tasks, we showcase samples of four randomly selected classes for each of the eleven utilized visual classification benchmarks.
